# Supplementary material for: Making it Short: Shortening the Comprehensive Inventory of Mindfulness Experiences Using Ant Colony Optimization
Source: Springer Nature journal article supplement (doi:10.1007/s12671-024-02302-z), 2024-02-01
Supplement: MOESM1 [file 26708910]

| **Supplementary Table S1** The 24-Item Comprehensive Inventory of Mindfulness Experiences: CHIME-S  *Administration Instructions: Please respond to each statement below by choosing the most suitable response option for you from the following: 1 = Almost Never, 2 = Infrequently, 3 = Somewhat Infrequently, 4 = Somewhat Frequently, 5 = Frequently, 6 = Almost Always.* | |
| --- | --- |
|  | ***Awareness of external experiences*** |
| 1. | I notice details in nature, such as colors, shapes, and textures. |
| 2. | I pay attention to sensations, such as the wind in my hair or sunshine on my face. |
| 3. | I notice sounds in my environment, such as birds chirping or cars passing. |
|  | ***Awareness of internal experiences*** |
| 4. | When my mood changes, I notice it right away. |
| 5. | When I talk to other people, I notice what feelings I am experiencing. |
| 6. | I am usually aware of how I am feeling at any given time. |
|  | ***Acting with awareness*** |
| 7. | It is easy for me to stay focused on what I am doing. |
| 8. | In everyday life, I get distracted by many memories, images, or daydreams. (R) |
| 9. | When I read, I have to reread paragraphs because I was thinking of something else. (R) |
|  | ***Awareness of thoughts’ relativity*** |
| 10. | In everyday life, I realize my thoughts are not always facts. |
| 11. | In everyday life, I am aware that my view on things is not always based on facts. |
| 12. | I am aware that even my strongly held opinions may change over time. |
|  | ***Insightful understanding*** |
| 13. | I am able to smile when I notice myself seeing things as more complicated than they actually are. |
| 14. | When I have needlessly given myself a hard time, I can see it with humor. |
| 15. | I am able to smile to myself when I notice I have made a big deal out of a small problem. |
|  | ***Accepting nonjudgmental attitude*** |
| 16. | In the ups and downs of life, I am kind to myself. |
| 17. | I see my mistakes and difficulties without judging myself. |
| 18. | Even when I make a big mistake, I treat myself with kindness and understanding. |
|  | ***Nonreactive decentering*** |
| 19. | When caught in thoughts and emotions, I am able to “step back” and quickly notice the thought or image without getting taken over by it. |
| 20. | I am able to notice my thoughts and feelings without getting tangled up in them. |
| 21. | I notice my thoughts and feelings and can also “step back” and observe them from a distance. |
|  | ***Openness to experience*** |
| 22. | I try to distract myself when I feel unpleasant emotions. (R) |
| 23. | I do not like it when I am angry or fearful and I try to get rid of these feelings. (R) |
| 24. | When I am in pain, I try to avoid this sensation as much as possible. (R) |
| ***Scoring Instructions:*** *Reverse-score all items marked with an “R”. Then, calculate the mean of the items included in each subscale to obtain the subscales’ scores. Finally, calculate the mean of all items in the scale to determine the total scale score.* | |

| **Supplementary Table S2** The 16-Item Comprehensive Inventory of Mindfulness Experiences: CHIME-XS  *Administration Instructions: Please respond to each statement below by choosing the most suitable response option for you from the following: 1 = Almost Never, 2 = Infrequently, 3 = Somewhat Infrequently, 4 = Somewhat Frequently, 5 = Frequently, 6 = Almost Always.* | |
| --- | --- |
|  | ***Awareness of external experiences*** |
| 1. | I pay attention to sensations, such as the wind in my hair or sunshine on my face. |
| 2. | I notice sounds in my environment, such as birds chirping or cars passing. |
|  | ***Awareness of internal experiences*** |
| 3. | When I talk to other people, I notice what feelings I am experiencing. |
| 4. | I am usually aware of how I am feeling at any given time. |
|  | ***Acting with awareness*** |
| 5. | In everyday life, I get distracted by many memories, images, or daydreams. (R) |
| 6. | When I read, I have to reread paragraphs because I was thinking of something else. (R) |
|  | ***Awareness of thoughts’ relativity*** |
| 7. | In everyday life, I realize my thoughts are not always facts. |
| 8. | In everyday life, I am aware that my view on things is not always based on facts. |
|  | ***Insightful understanding*** |
| 9. | I am able to smile when I notice myself seeing things as more complicated than they actually are. |
| 10. | I am able to smile to myself when I notice I have made a big deal out of a small problem. |
|  | ***Accepting nonjudgmental attitude*** |
| 11. | In the ups and downs of life, I am kind to myself. |
| 12. | Even when I make a big mistake, I treat myself with kindness and understanding. |
|  | ***Nonreactive decentering*** |
| 13. | When caught in thoughts and emotions, I am able to “step back” and quickly notice the thought or image without getting taken over by it. |
| 14. | I am able to notice my thoughts and feelings without getting tangled up in them. |
|  | ***Openness to experience*** |
| 15. | I try to stay busy to avoid specific thoughts or feelings from coming to mind. (R) |
| 16. | When I am in pain, I try to avoid this sensation as much as possible. (R) |
| ***Scoring Instructions:*** *Reverse-score all items marked with an “R”. Then, calculate the mean of the items included in each subscale to obtain the subscales’ scores. Finally, calculate the mean of all items in the scale to determine the total scale score.* | |

|  |
| --- |
| 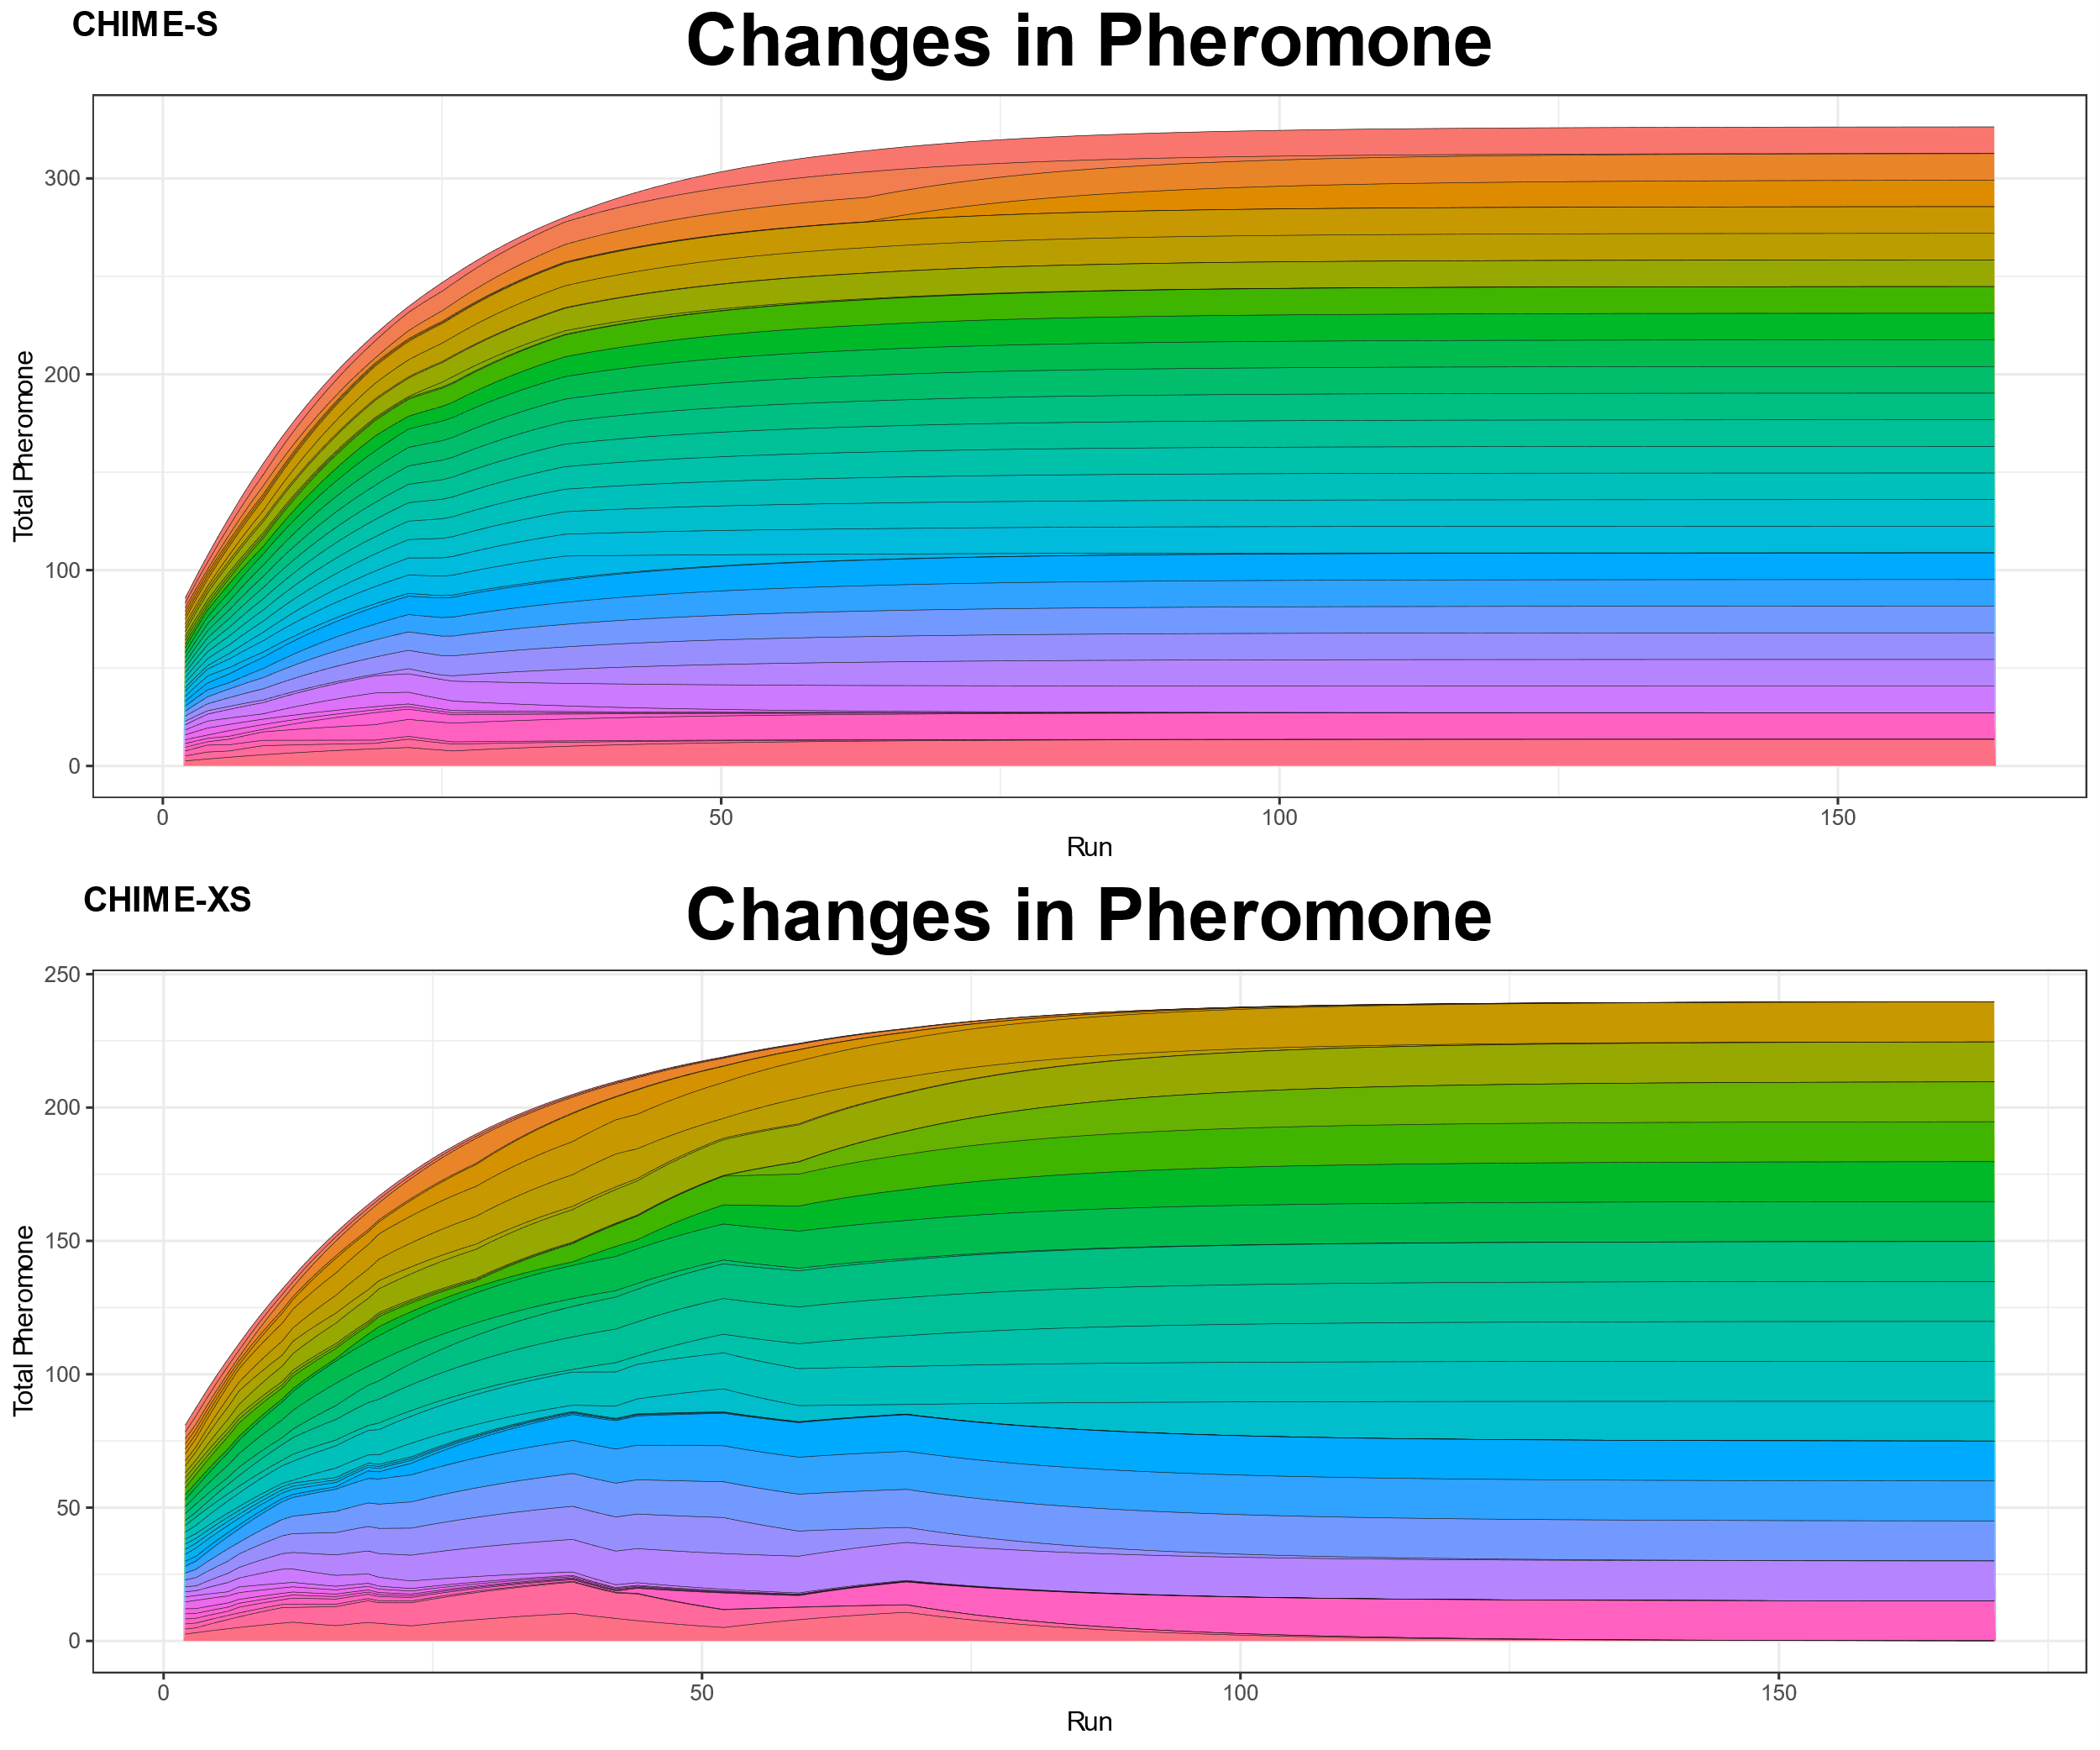 |
| Figure S1 Change in total pheromone during the ant colony optimization in the CHIME short and extra short version. |

| **Supplementary Table S3** Facet intercorrelations between all CHIME facets for the original configuration, the CHIME-S, the CHIME-XS, and the Dutch CHIME-S | | | | | | | |
| --- | --- | --- | --- | --- | --- | --- | --- |
| New Zealand Sample | | | | | | | |
|  | 1 | 2 | 3 | 4 | 5 | 6 | 7 |
| *1. Awareness of internal experiences* |  |  |  |  |  |  |  |
| *2. Awareness of external experiences* | 0.55***  0.38***  0.35***  0.41*** |  |  |  |  |  |  |
| *3. Acting with awareness* | 0.06  0.09*  0.04  0.05 | -0.06  -0.06  -0.17***  -0.06 |  |  |  |  |  |
| *4. Accepting nonjudgmental attitude* | 0.14**  0.25***  0.26***  0.14** | 0.10*  0.12**  0.10*  0.05 | 0.23***  0.24***  0.18***  0.23*** |  |  |  |  |
| *5. Nonreactive decentering* | 0.34***  0.36***  0.33***  0.27*** | 0.28***  0.27***  0.19***  0.22*** | 0.31***  0.28***  0.22***  0.33*** | 0.56***  0.61***  0.59***  0.58*** |  |  |  |
| *6. Openness to experience* | -0.15***  -0.17***  -0.13**  -0.17*** | -0.13**  -0.14**  -0.14**  -0.13** | 0.23***  0.15***  0.24***  0.21*** | 0.22***  0.01  0.20***  0.24*** | 0.02  -0.11*  0.10*  0.08 |  |  |
| *7. Awareness of thoughts’ relativity* | 0.44***  0.41***  0.35***  0.42*** | 0.32***  0.29***  0.23***  0.29*** | -0.01  -0.01  -0.02  -0.01 | 0.16***  0.28***  0.28***  0.20*** | 0.36***  0.40***  0.40***  0.37*** | -0.18***  -0.20***  -0.12**  -0.14** |  |
| *8. Insightful understanding* | 0.40***  0.26***  0.25***  0.20*** | 0.30***  0.21***  0.17***  0.21*** | 0.11*  0.13**  0.09*  0.13** | 0.38***  0.45***  0.37***  0.38*** | 0.61***  0.57***  0.47***  0.55*** | -0.11*  -0.16***  -0.05  -0.06 | 0.50***  0.40***  0.35***  0.40*** |
| US Sample 2 | | | | | | | |
|  | 1 | 2 | 3 | 4 | 5 | 6 | 7 |
| *1. Awareness of internal experiences* |  |  |  |  |  |  |  |
| *2. Awareness of external experiences* | 0.72***  0.66***  0.65***  0.68*** |  |  |  |  |  |  |
| *3. Acting with awareness* | -0.17***  -0.07  -0.26***  -0.09* | -0.03  0.00  -0.24***  0.00 |  |  |  |  |  |
| *4. Accepting nonjudgmental attitude* | 0.20***  0.49***  0.48***  0.24*** | 0.23***  0.48***  0.46***  0.26*** | 0.35***  0.16***  -0.05  0.38*** |  |  |  |  |
| *5. Nonreactive decentering* | 0.60***  0.54***  0.56***  0.55*** | 0.61***  0.60***  0.57***  0.59*** | 0.03  0.17***  -0.12**  0.17*** | 0.55***  0.74***  0.69***  0.58*** |  |  |  |
| *6. Openness to experience* | -0.56***  -0.54***  -0.40***  -0.58*** | -0.48***  -0.49***  -0.38***  -0.46*** | 0.46***  0.34***  0.55***  0.41*** | 0.12**  -0.30***  -0.16***  0.08* | -0.38***  -0.40***  -0.25***  -0.32*** |  |  |
| *7. Awareness of thoughts’ relativity* | 0.67***  0.59***  0.51***  0.61*** | 0.59***  0.54***  0.48***  0.54*** | -0.26***  -0.16***  -0.38***  -0.16*** | 0.14***  0.46***  0.38***  0.20*** | 0.59***  0.59***  0.52***  0.56*** | -0.63***  -0.61***  -0.51***  -0.60*** |  |
| *8. Insightful understanding* | 0.68***  0.52***  0.52***  0.51*** | 0.62***  0.54***  0.52***  0.54*** | -0.14***  0.04  -0.19***  0.04 | 0.42***  0.72***  0.64***  0.56*** | 0.77***  0.75***  0.70***  0.75*** | -0.49***  -0.40***  -0.30***  -0.38*** | 0.71***  0.59***  0.55***  0.59*** |
| US Sample 2 | | | | | | | |
|  | 1 | 2 | 3 | 4 | 5 | 6 | 7 |
| *1. Awareness of internal experiences* |  |  |  |  |  |  |  |
| *2. Awareness of external experiences* | 0.63***  0.40***  0.39***  0.47*** |  |  |  |  |  |  |
| *3. Acting with awareness* | 0.02  0.12  -0.01  0.09 | -0.14*  -0.12  -0.20**  -0.12 |  |  |  |  |  |
| *4. Accepting nonjudgmental attitude* | 0.07  0.26***  0.28***  0.22** | 0.04  0.12  0.09  0.08 | 0.26***  0.18**  0.14*  0.24*** |  |  |  |  |
| *5. Nonreactive decentering* | 0.21**  0.37***  0.36***  0.21** | 0.19**  0.19**  0.10  0.15* | 0.26***  0.28***  0.23***  0.25*** | 0.53***  0.57***  0.52***  0.58*** |  |  |  |
| *6. Openness to experience* | -0.37***  -0.28***  -0.25***  -0.29*** | -0.21**  -0.22**  -0.21**  -0.16* | 0.25***  0.17*  0.28***  0.23*** | 0.26***  0.04  0.14  0.28*** | 0.02  -0.14*  0.06  0.08 |  |  |
| *7. Awareness of thoughts’ relativity* | 0.41***  0.34***  0.20**  0.33*** | 0.25***  0.22**  0.19**  0.22** | -0.06  0.00  -0.11  0.00 | 0.06  0.13  0.07  0.04 | 0.25***  0.28***  0.19**  0.20** | -0.36***  -0.34***  -0.32***  -0.34*** |  |
| *8. Insightful understanding* | 0.33***  0.20**  0.16*  0.16* | 0.20**  0.17*  0.13  0.17* | 0.15*  0.23***  0.24***  0.23*** | 0.32***  0.38***  0.29***  0.33*** | 0.50***  0.42***  0.32***  0.46*** | -0.04  -0.02  0.11  0.08 | 0.47***  0.32***  0.24***  0.32*** |
| *Notes.* ****p* < 0.001, ***p* < 0.01, **p* < 0.05, Correlations coefficients within each cell represent the original configuration, the CHIME-S, the CHIME-XS, and the Dutch CHIME-S | | | | | | | |
